# Supplementary material for: Depolymerization of sodium polyphosphates on an iron oxide surface at high temperature
Source: Royal Society of Chemistry journal article supplement (doi:10.1039/c7cp08364e), 2018-01-01
Supplement: c7cp08364e1.pdf [file c7cp08364e1.pdf]

Supporting Material

# DEPOLYMERIZATION OF SODIUM POLYPHOSPHATES ON IRON OXIDE SURFACE AT HIGH TEMPERATURE

M. H. Le,<sup>a</sup> A. K. Tieu,<sup>a</sup> H. Zhu,<sup>\*a</sup> D. T. Ta,<sup>a</sup> H. Yu,<sup>b</sup> T. T. H. Ta,<sup>a</sup> V. N. Tran<sup>a</sup> and S. Wan<sup>a</sup>

<sup>a</sup> School of Mechanical, Materials, Mechatronic and Biomedical Engineering, University of Wollongong, Northfield Avenue, Wollongong, NSW, 2522, Australia

<sup>b</sup> School of Chemistry, University of Wollongong, Northfield Avenue, Wollongong, NSW, 2522, Australia

\* Corresponding author: [hongtao@uow.edu.au](mailto:hongtao@uow.edu.au)

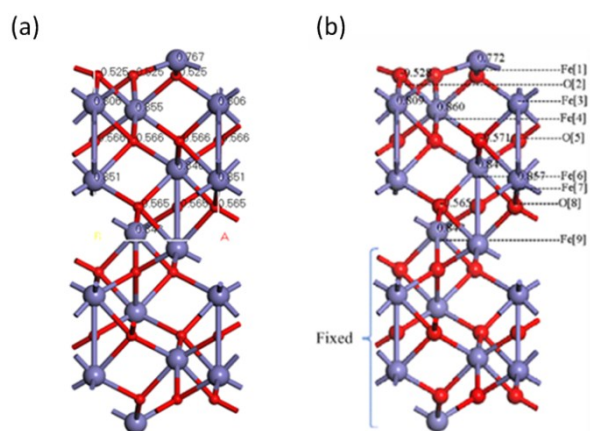

Fig. S1: Partial charges of nine top layers of  $\text{Fe}_2\text{O}_3$  (0001) surface of (a) current work and (b) Ta *et al.*<sup>1</sup>

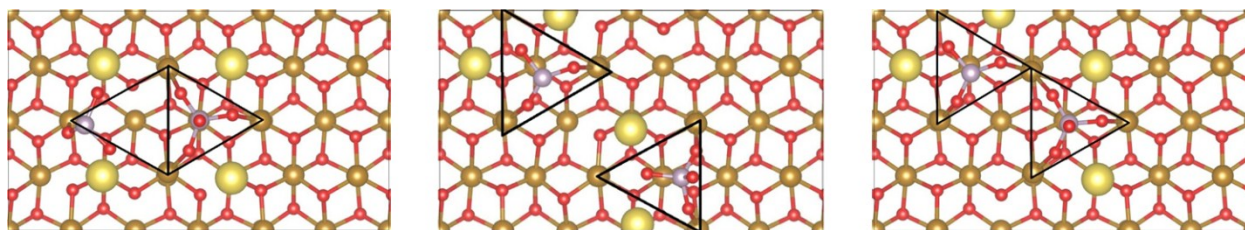

Fig. S2: Different relative position of Fe adsorption sites triangles for  $\text{PO}_4$  or  $\text{PO}_3$  units. The triangles can share one edge (left), be separate (middle) and share one vertex (right). Red, gold, purple and yellow spheres represent oxygen, iron, phosphorus and sodium atoms, respectively.

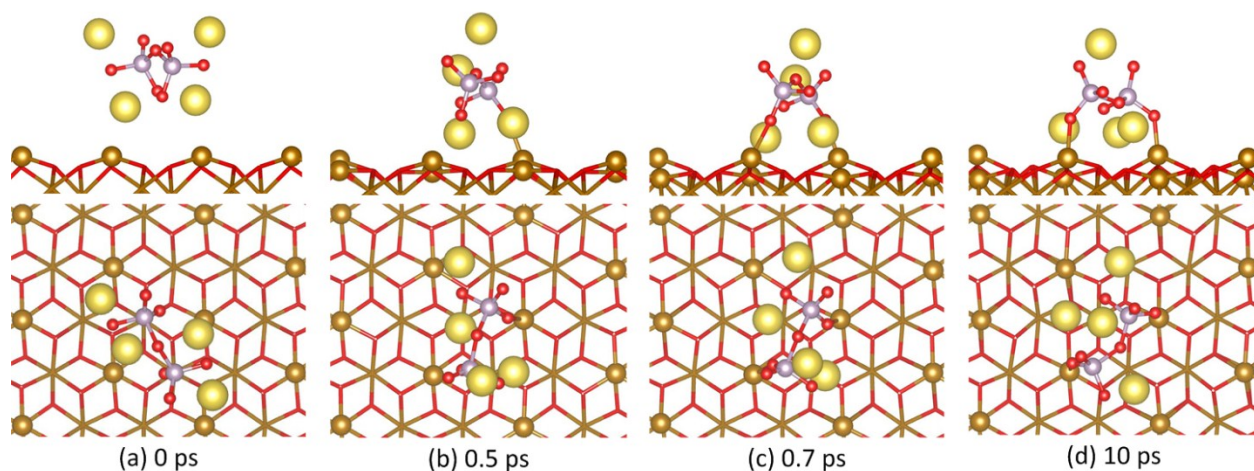

Fig. S3: Snapshots of FPMD at 300K of  $\text{Na}_4\text{P}_2\text{O}_7$  cluster on  $\text{Fe}_2\text{O}_3$  surface for 0 ps (a), 0.5 ps (b), 0.7 ps (c), and 10 ps (d). Structures have been displayed in side view (upper) and top view (lower). Red, gold, purple and yellow spheres represent oxygen, iron on top surface, phosphorus and sodium atoms, respectively. Surface oxygen and lower-layered iron atoms have been removed for apparent visualization.

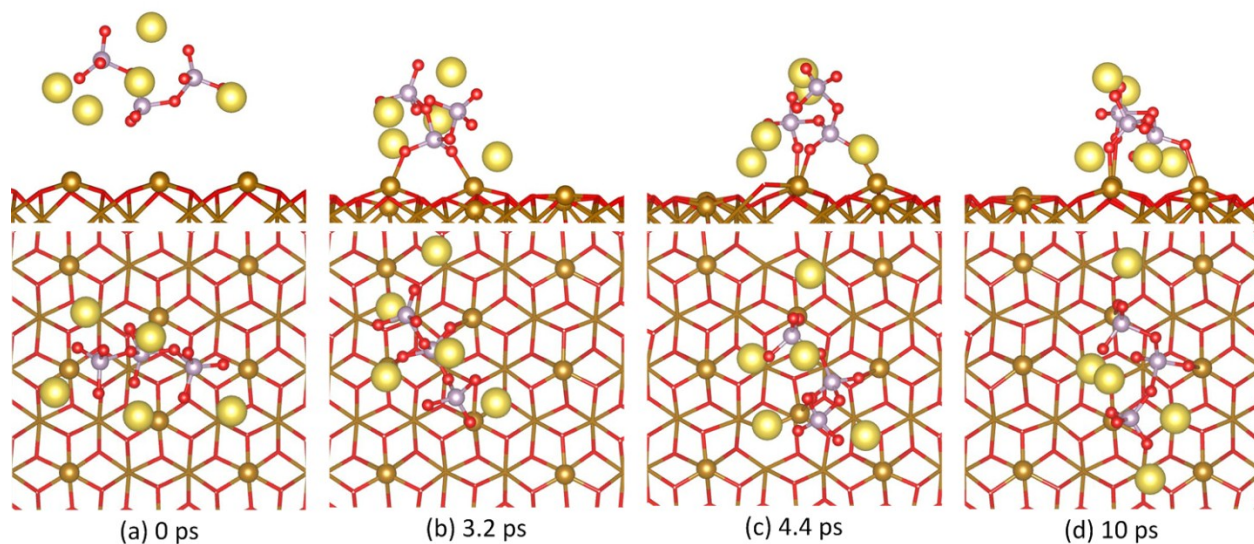

Fig. S4: Snapshots of FPMD at 300K of  $\text{Na}_5\text{P}_3\text{O}_{10}$  cluster on  $\text{Fe}_2\text{O}_3$  surface for 0 ps (a), 3.2 ps (b), 4.4 ps (c), and 10 ps (d). Structures have been displayed in side view (upper) and top view (lower). Red, gold, purple and yellow spheres represent oxygen, iron on top surface, phosphorus and sodium atoms, respectively. Surface oxygen and lower-layered iron atoms have been removed for apparent visualization.

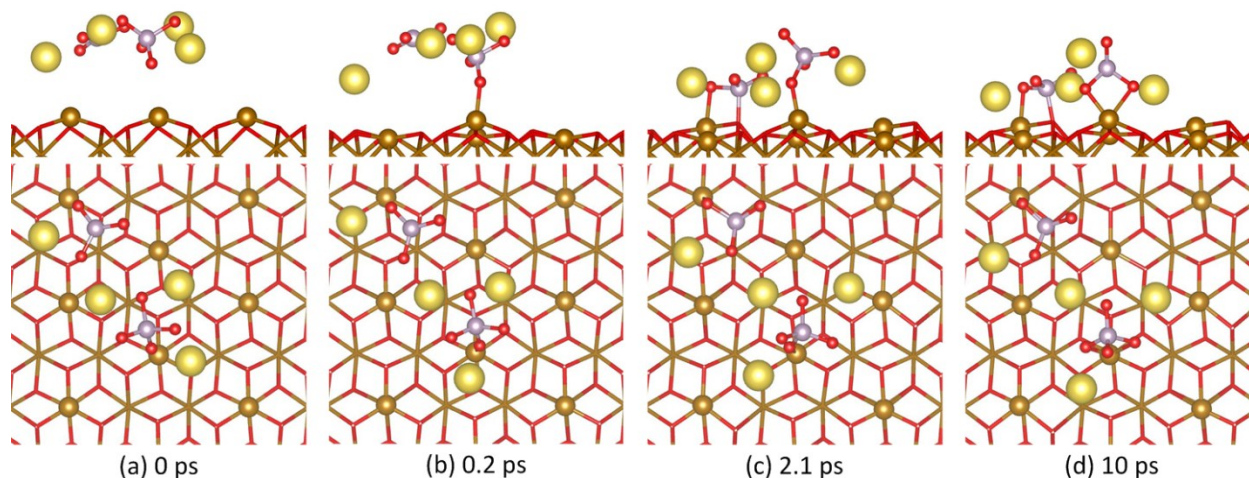

Fig. S5: Snapshots of FPMD at 300K of  $\text{PO}_3$  and  $\text{PO}_4$  units on  $\text{Fe}_2\text{O}_3$  surface for 0 ps (a), 0.2 ps (b), 2.1 ps (c), and 10 ps (d). Structures have been displayed in side view (upper) and top view (lower). Red, gold, purple and yellow spheres represent oxygen, iron on top surface, phosphorus and sodium atoms, respectively. Surface oxygen and lower-layered iron atoms have been removed for apparent visualization.

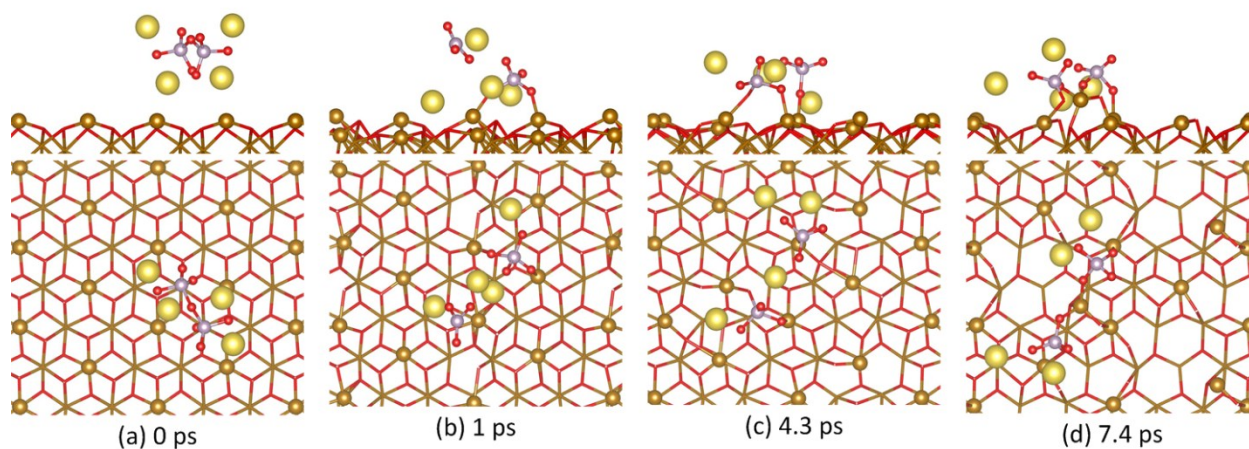

Fig. S6: Snapshots of FPMD at 1500K of  $\text{Na}_4\text{P}_2\text{O}_7$  cluster on  $\text{Fe}_2\text{O}_3$  surface for 0 ps (a), 1 ps (b), 4.3 ps (c), and 7.4 ps (d). Structures have been displayed in side view (upper) and top view (lower). Red, gold, purple and yellow spheres represent oxygen, iron on top surface, phosphorus and sodium atoms, respectively. Surface oxygen and lower-layered iron atoms have been removed for apparent visualization.

## REFERENCE

1. T. D. Ta, A. K. Tieu, H. Zhu and B. Kosasih, *The Journal of Physical Chemistry C*, 2015, **119**, 12999-13010.
